# Supplementary material for: Detailed Seed Cone Morpho-Anatomy Provides New Insights into Seed Cone Origin and Evolution of Podocarpaceae; Podocarpoid and Dacrydioid Clades
Source: MDPI journal article supplement (doi:10.3390/plants12223903), 2023-11-19
Supplement: s1 [file s1]

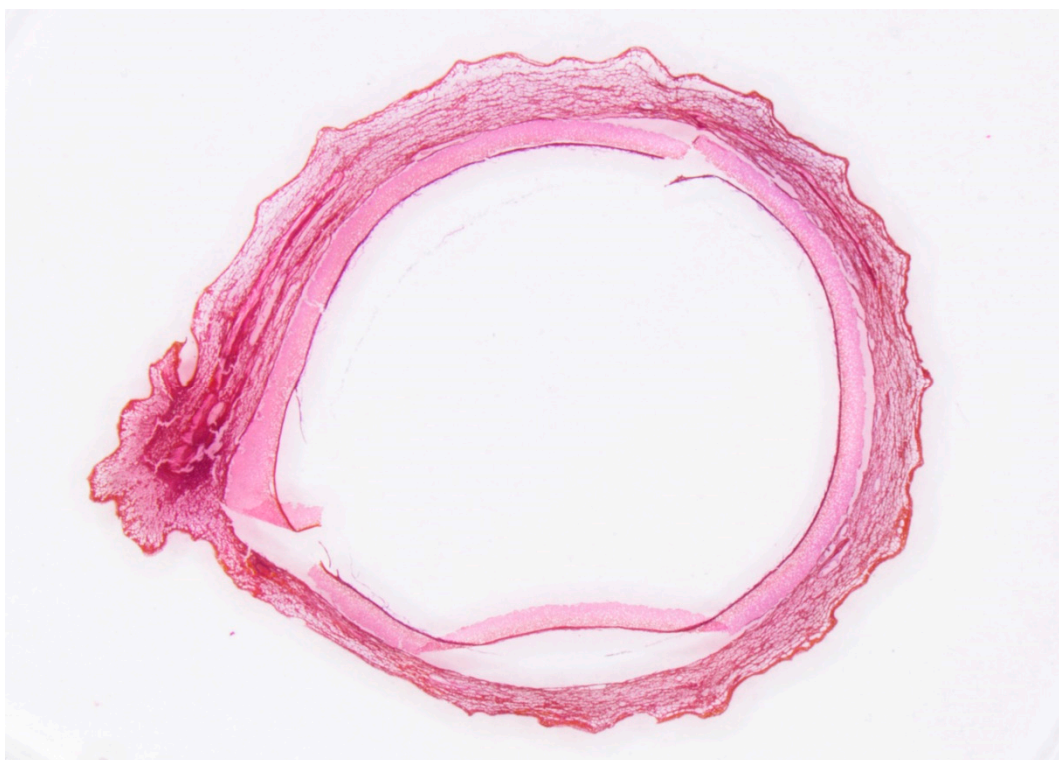

(A)

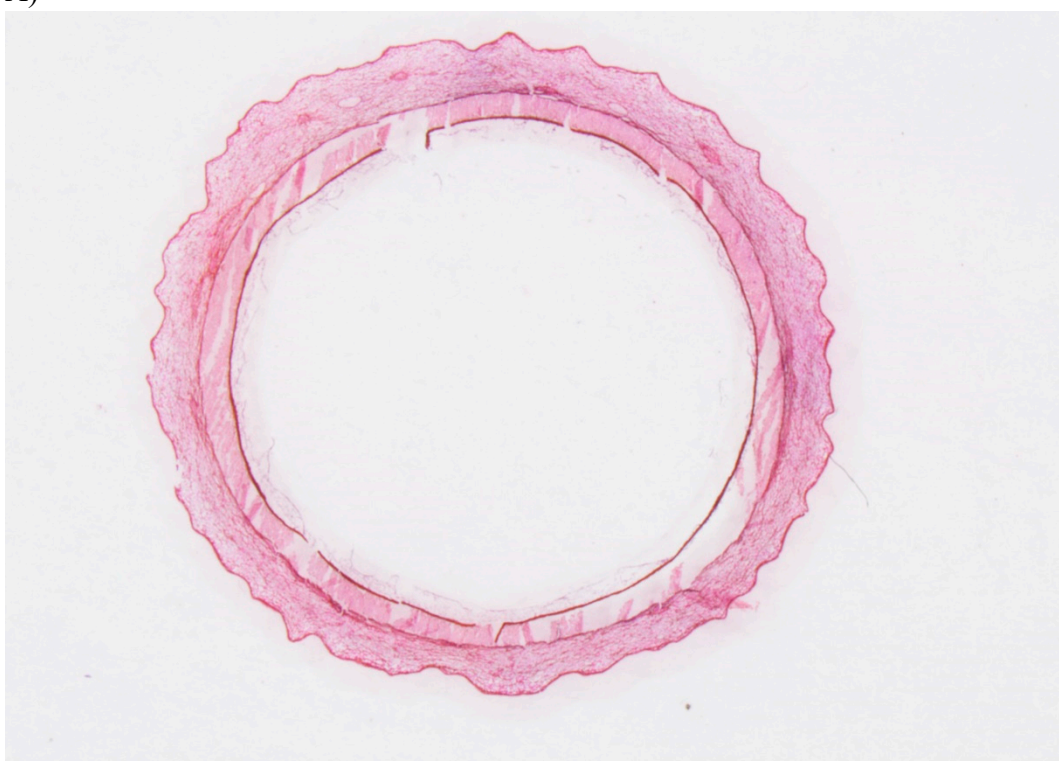

(B)

**Figure S1.** Longitudinal (A) and cross section (B) of *Nageia nagi*.

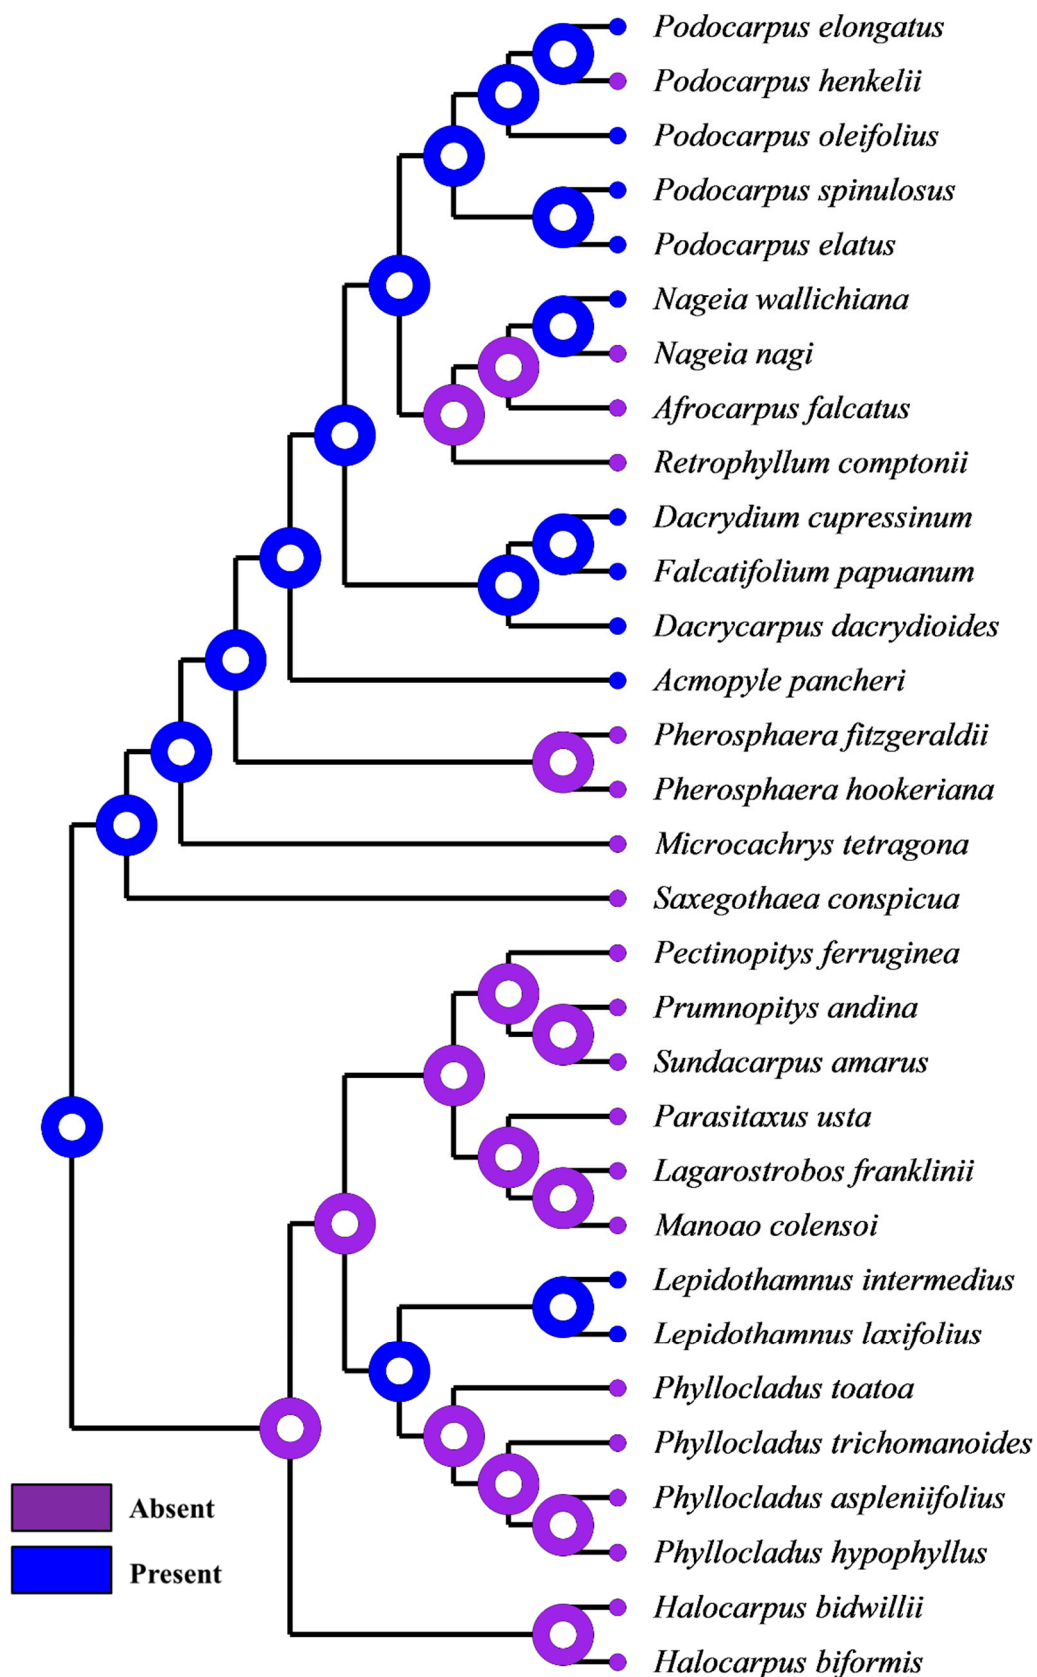

**Figure S2.** Character mapping of the receptaculum presence in different genera of Podocarpaceae using RASP 4.2 (Reconstruct Ancestral State) Maximum likelihood.



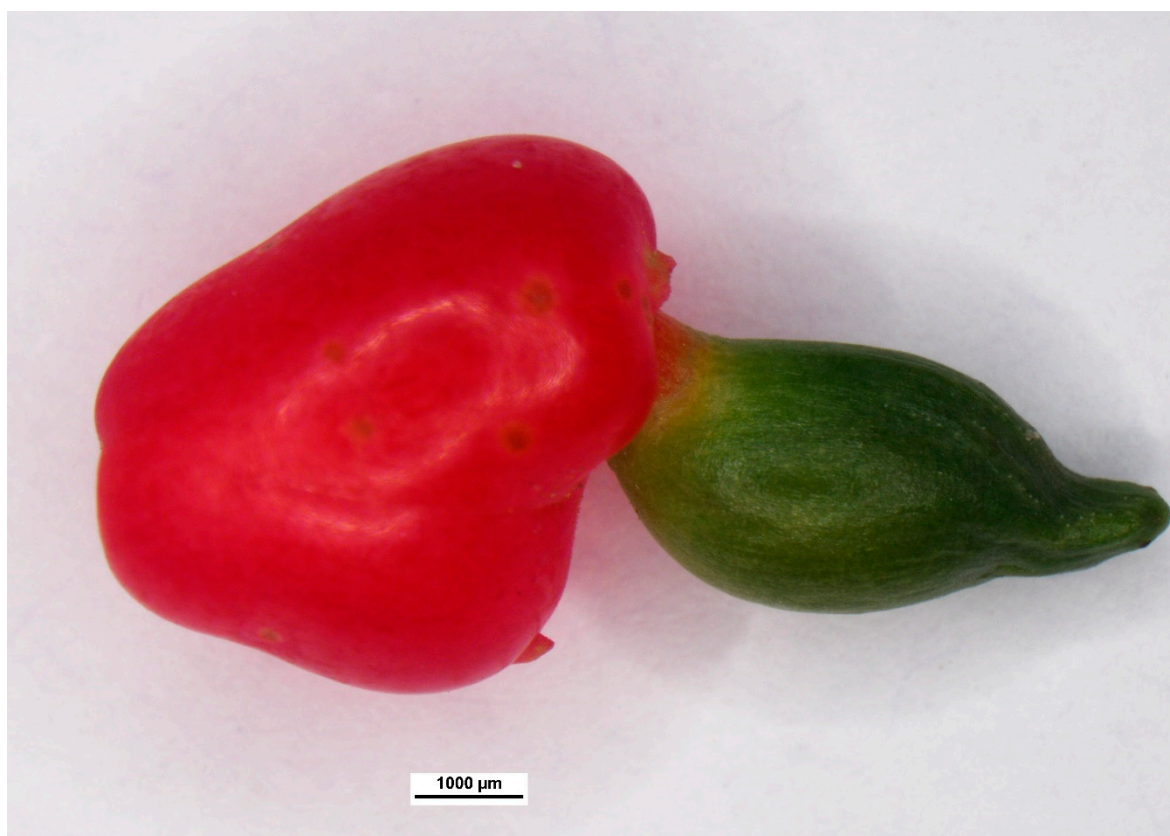

A)

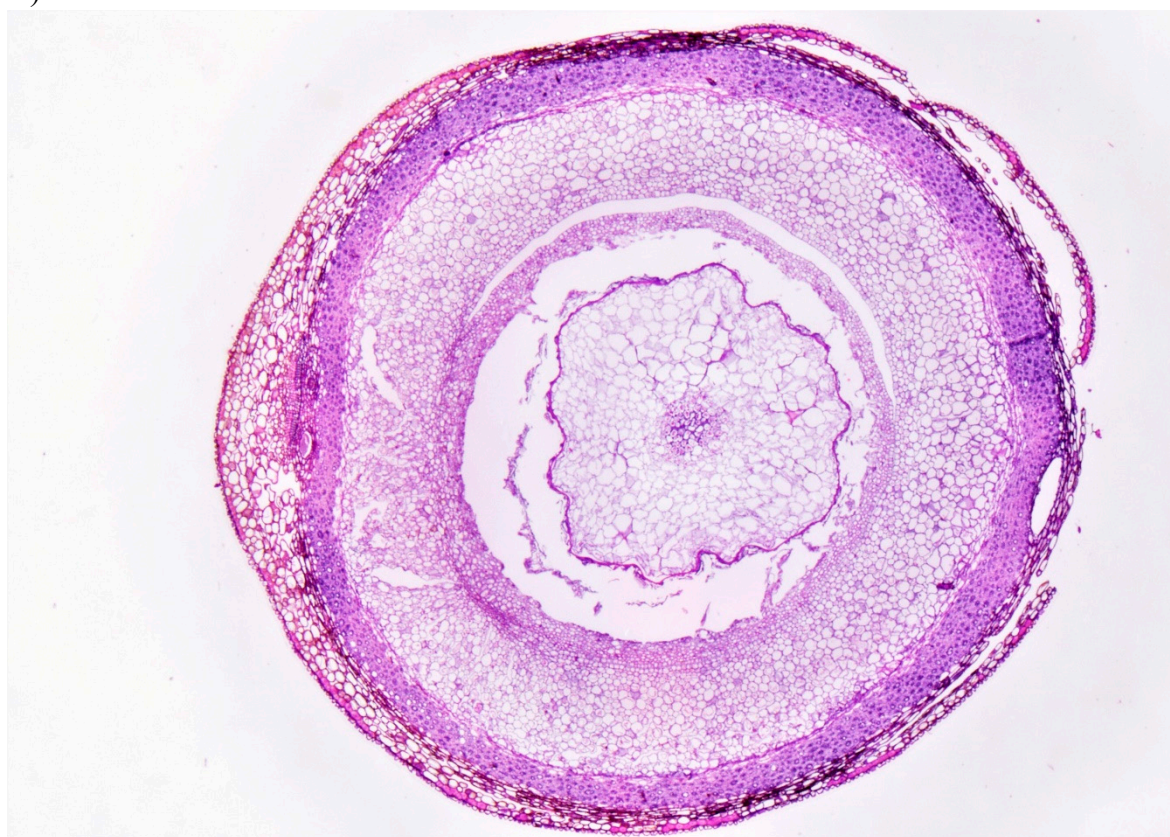

B)

**Figure S3.** Seed cone (A) and cross section (B) of *Podocarpus lawrencei*.

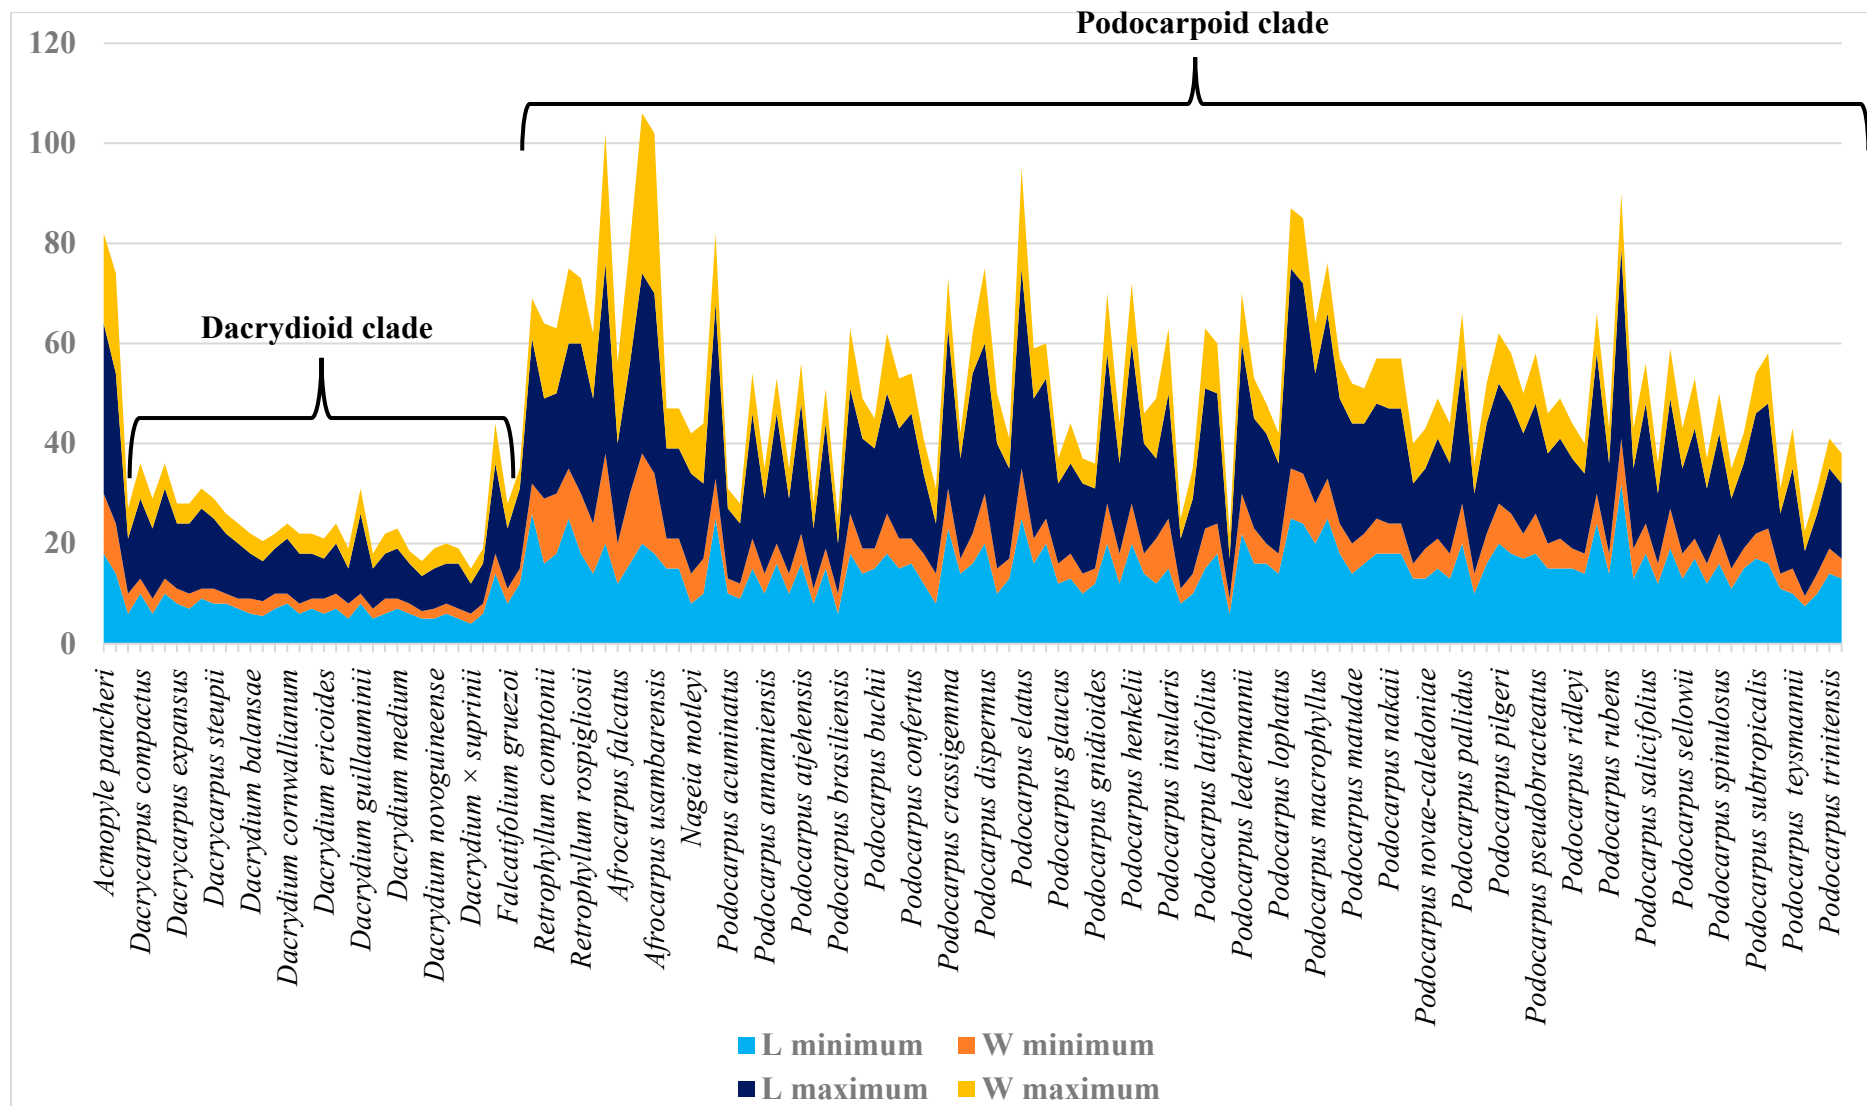

**Figure S4.** Variation in seed cone size; L (length) and W (width). Species of Podocarpoid clade shows larger seed cone size as compared to Dacrydioid clade.
